# Supplementary material for: Idiopathic Scoliosis as a Conversion Reaction to Stress with the Neural Effect of a “Distorting Mirror”
Source: MDPI journal article supplement (doi:10.3390/life16020270), 2026-02-04
Supplement: s1 [file life-4100263-supplementary.pdf › life-4100263-supplementary.pdf]

**Table 1.** Characteristics and distribution of included studies by thematic categories. Values in square brackets indicate the primary references assigned to each thematic category, while values in parentheses denote additional references that recur across multiple sections. The total number of unique studies included across all categories is  $n = 225$ .

| Section                                                              | Category                          | Number      | List                                                                          |
|----------------------------------------------------------------------|-----------------------------------|-------------|-------------------------------------------------------------------------------|
| Introduction                                                         | Article                           | [3], ([13]) | [15,16,17], ([2,5,6,7,8,9,10,11,13,14,18,19,20])                              |
|                                                                      | Review                            | [1], ([2])  | [1], ([3,4])                                                                  |
|                                                                      | Case Reports                      | [1]         | [12]                                                                          |
| Leading Role of the Central Nervous System in the Development of AIS | Article                           | [25]        | [2,5,6,7,8,9,10,11,13,14,20,21,27,31,32,33,34,35,36,37,38,39,40,41,42]        |
|                                                                      | Review                            | [6]         | [3,4,26,28,29,30]                                                             |
|                                                                      | Case Reports                      | [4]         | [22,23,24,25]                                                                 |
| Brain Lateralization                                                 | Article                           | [15], ([1]) | [18,19,43,50,51,52,53,55,56,57,58,60,61,63,64], ([20])                        |
|                                                                      | Review                            | [8]         | [45,46,47,48,49,54,59,62]                                                     |
|                                                                      | Chapter of a book                 | [1]         | [44]                                                                          |
| Stress as a Trigger for the Development of AIS                       | Article                           | [4]         | [71,73,74,75]                                                                 |
|                                                                      | Review                            | [7], ([1])  | [65,66,67,68,69,70,72], ([48])                                                |
| Three-Plane Spinal Deformity                                         | Article                           | [9]         | [82,83,84,85,86,87,88,89,90]                                                  |
|                                                                      | Review                            | [1]         | [80]                                                                          |
|                                                                      | Hypothesis                        | [5]         | [76,77,78,79,81]                                                              |
| Sex Differences in Stress Response                                   | Article                           | [9]         | [92,95,98,99,100,101,102,103,104]                                             |
|                                                                      | Review                            | [5]         | [91,93,94,96,97]                                                              |
| Sex Differences in the Development and Progression of AIS            | Article                           | [19]        | [108,109,110,114,115,116,117,121,122,123,124,125,126,127,129,130,131,133,134] |
|                                                                      | Review                            | [7], ([1])  | [106,107,111,112,118,119,132], ([72])                                         |
|                                                                      | Editorial                         | [1]         | [113]                                                                         |
|                                                                      | Open access peer-reviewed chapter | [1]         | [120]                                                                         |

|                                               |              |              |                                                                                                                                                                                                                                                                                                           |
|-----------------------------------------------|--------------|--------------|-----------------------------------------------------------------------------------------------------------------------------------------------------------------------------------------------------------------------------------------------------------------------------------------------------------|
|                                               |              |              |                                                                                                                                                                                                                                                                                                           |
|                                               | Hypothesis   | [2]          | [105,128]                                                                                                                                                                                                                                                                                                 |
| Disturbance of the Body Schema                | Article      | [11]         | [144,145, 149,152,153,155,156,157,158,161,162]                                                                                                                                                                                                                                                            |
|                                               | Review       | [11]         | [135,136,137,138,139,140,142,143, 146,147,154]                                                                                                                                                                                                                                                            |
|                                               | Case Reports | [3]          | [141,150,151]                                                                                                                                                                                                                                                                                             |
|                                               | Hypothesis   | [3]          | [148,159,160]                                                                                                                                                                                                                                                                                             |
| Conversion Disorder                           | Article      | [11]         | [167,171,172,173,177,178,179, 181,182,186,187]                                                                                                                                                                                                                                                            |
|                                               | Review       | [10], ([1])  | [163,166,169,174,175,176, 180,183,184,185],[49])                                                                                                                                                                                                                                                          |
|                                               | Case Reports | [2]          | [164,168]                                                                                                                                                                                                                                                                                                 |
|                                               | Comment      | [1]          | [165]                                                                                                                                                                                                                                                                                                     |
|                                               | Editorial    | [1]          | [170]                                                                                                                                                                                                                                                                                                     |
| Development of the “Distorting Mirror Effect” | Article      | [9]          | [194,197,201,202,203,204,205,206,207]                                                                                                                                                                                                                                                                     |
|                                               | Review       | [8]          | [188,189,190,191,192,193,195,196]                                                                                                                                                                                                                                                                         |
|                                               | Case Reports | [2]          | [198,200]                                                                                                                                                                                                                                                                                                 |
|                                               | Hypothesis   | [1]          | [199]                                                                                                                                                                                                                                                                                                     |
| Discussion                                    | Article      | [12], ([62]) | [209, 210, 211,213, 214, 215,216,217, 219, 225, 222,223], ([37,52,55,56,58,65,71,73,74,75,76,77,78,79,83,84,85,89,90, 92,95,100,102,103, 105,110, 121,122,123, 124,125,126,127, 128, 129,130,132,133,134,144,145,146,149,152,153, 155,156,157,158,167,171,172,173,177,179, 180,181,182,186,187, 197,205]) |
|                                               | Review       | [6],[34])    | [208, 212, 218, 220, 221, 224], ([48,49, 54,66,67, 68,69, 70, 72,91,93, 94,96, 97, 106,111,112,118, 119, 140, 143, 147, 154,166, 174,175, 176,183,184,185,188,189, 191,195])                                                                                                                              |
|                                               | Case Reports | ([4])        | ([22,150, 198,200])                                                                                                                                                                                                                                                                                       |
|                                               | Editorial    | ([1])        | ([170])                                                                                                                                                                                                                                                                                                   |
|                                               | Hypothesis   | ([1])        | ([199])                                                                                                                                                                                                                                                                                                   |
